# Supplementary material for: Airway regulatory T cells are decreased in COPD with a rapid decline in lung function
Source: Springer Nature journal article supplement (doi:10.1186/s12931-020-01593-9), 2020-12-01
Supplement: MOESM1 [file 18681856]

Additional file 1

**Table 1: Antibodies conjugated fluorophores, clone and supplier**

| <b>Antibodies conjugated fluorophores</b>                       | <b>Clone</b>           | <b>Supplier</b>                                      |
|-----------------------------------------------------------------|------------------------|------------------------------------------------------|
| CD45 Fluorescein isothiocyanate / CD14 Phycoerytrin (Simultest) | CD45: 2D1 / CD14: MΦP9 | Becton Dickinson (San Jose, CA, USA)                 |
| CD3 Allophycocyanin                                             | SK7                    | Becton Dickinson (San Jose, CA, USA)                 |
| CD4 Fluorescein isothiocyanate                                  | SK3                    | Becton Dickinson (San Jose, CA, USA)                 |
| CD25 Phycoerytrin-Cy5                                           | M-A 251                | Becton Dickinson (San Jose, CA, USA)                 |
| FoxP3 Phycoerytrin                                              | 236A/E7                | eBioscience, Inc. (Thermo Fisher Scientific, Sweden) |

**Figure 1: FACS gating strategy**

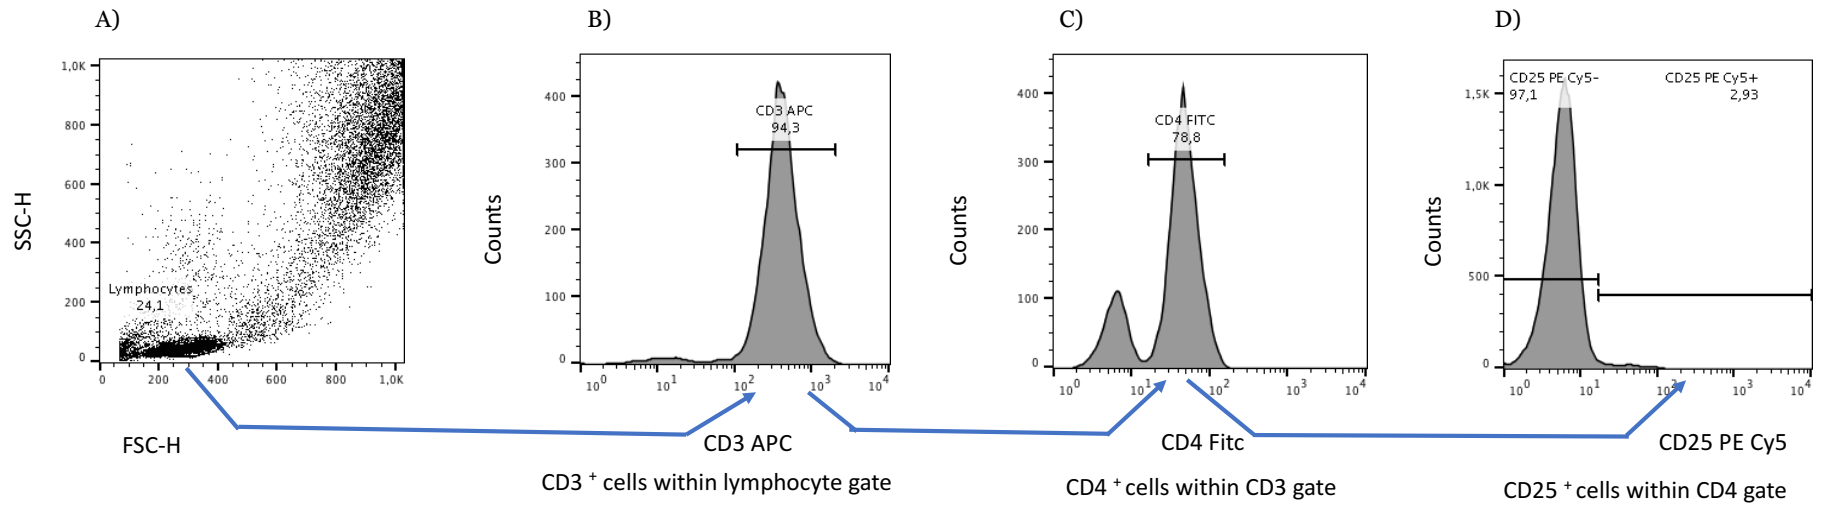

1.1 *General gating strategy.* Populations were defined in a stepwise manner using the logical operators found in the CellQuest software. In the example above, panel B shows CD3<sup>+</sup> events within the lymphocyte gate. Panel C shows CD4<sup>+</sup> events within the CD3 gate (logical operators: CD3<sup>+</sup> AND lymphocyte gate); and panel D shows CD25<sup>+</sup> events within the CD4 gate (logical operators: CD4<sup>+</sup> AND CD3<sup>+</sup> AND lymphocyte gate).

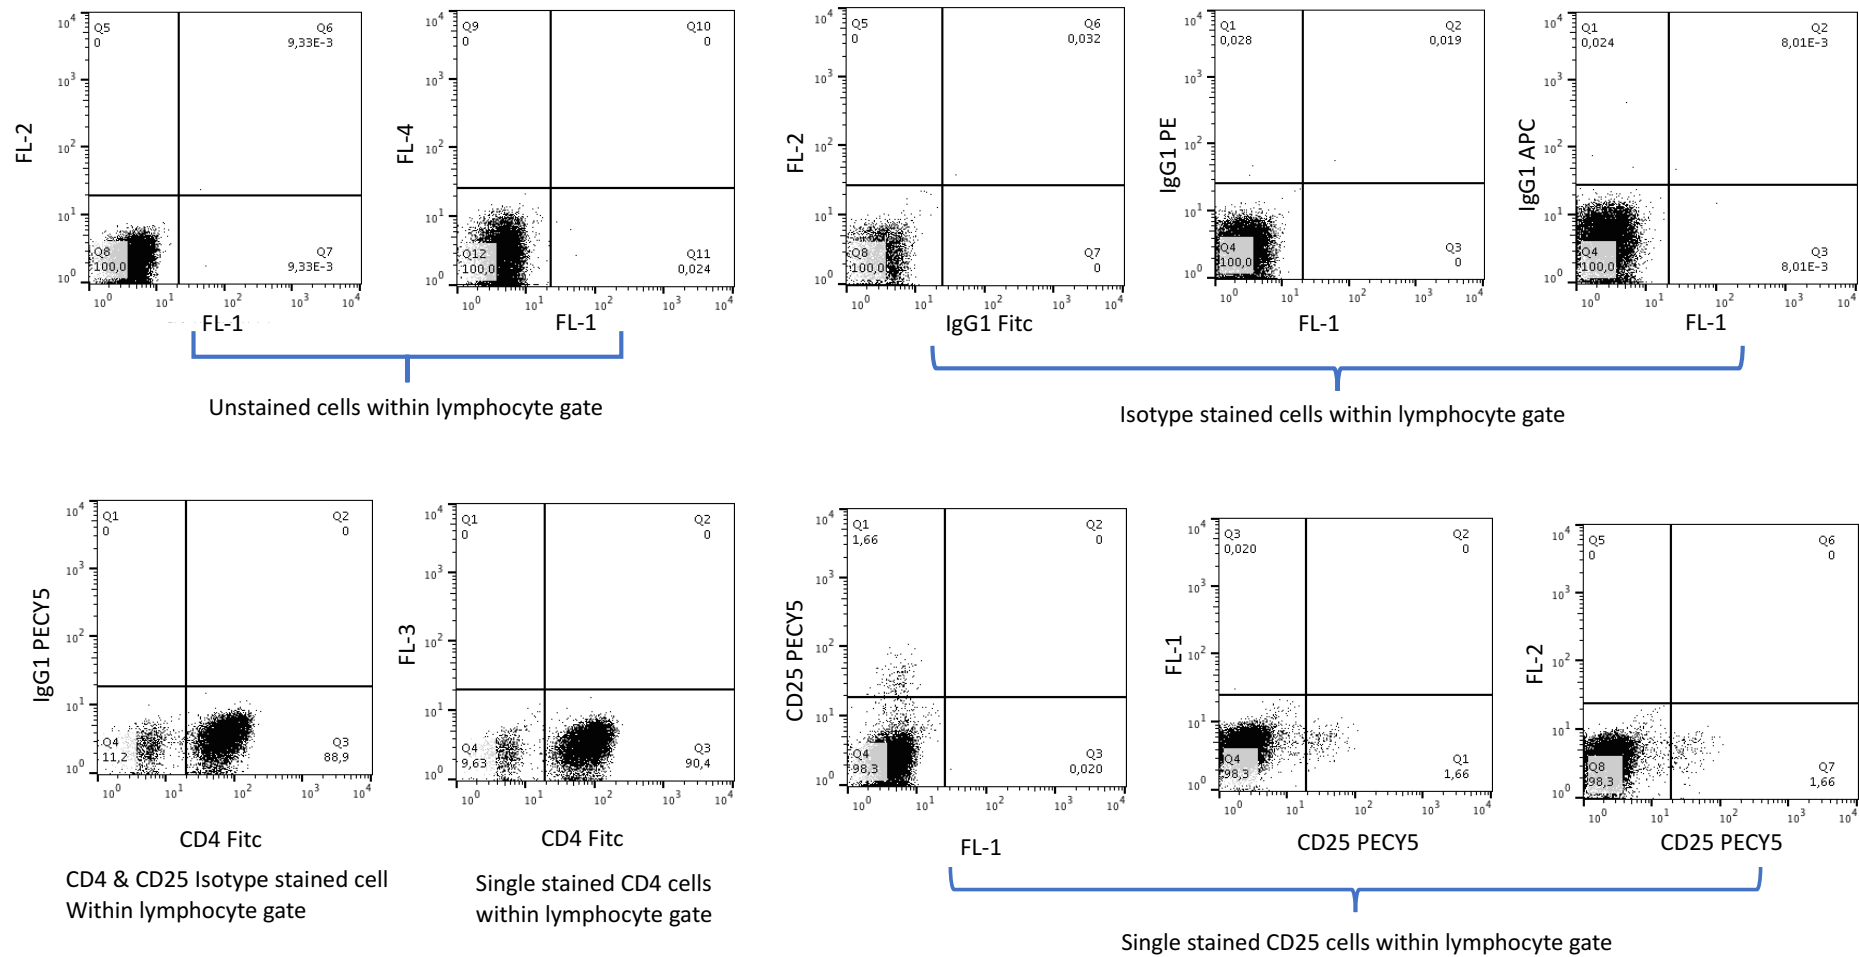

1.2 Example plots of controls used to confirm quadrant placement and specificity of antibody expression within respective cell population. As shown above, unstained cells, isotype stained cells, single staining of parent cells and single stained cells – all within the lymphocyte gate – were used when setting the quadrants for (in this example) the CD25<sup>+</sup> population.

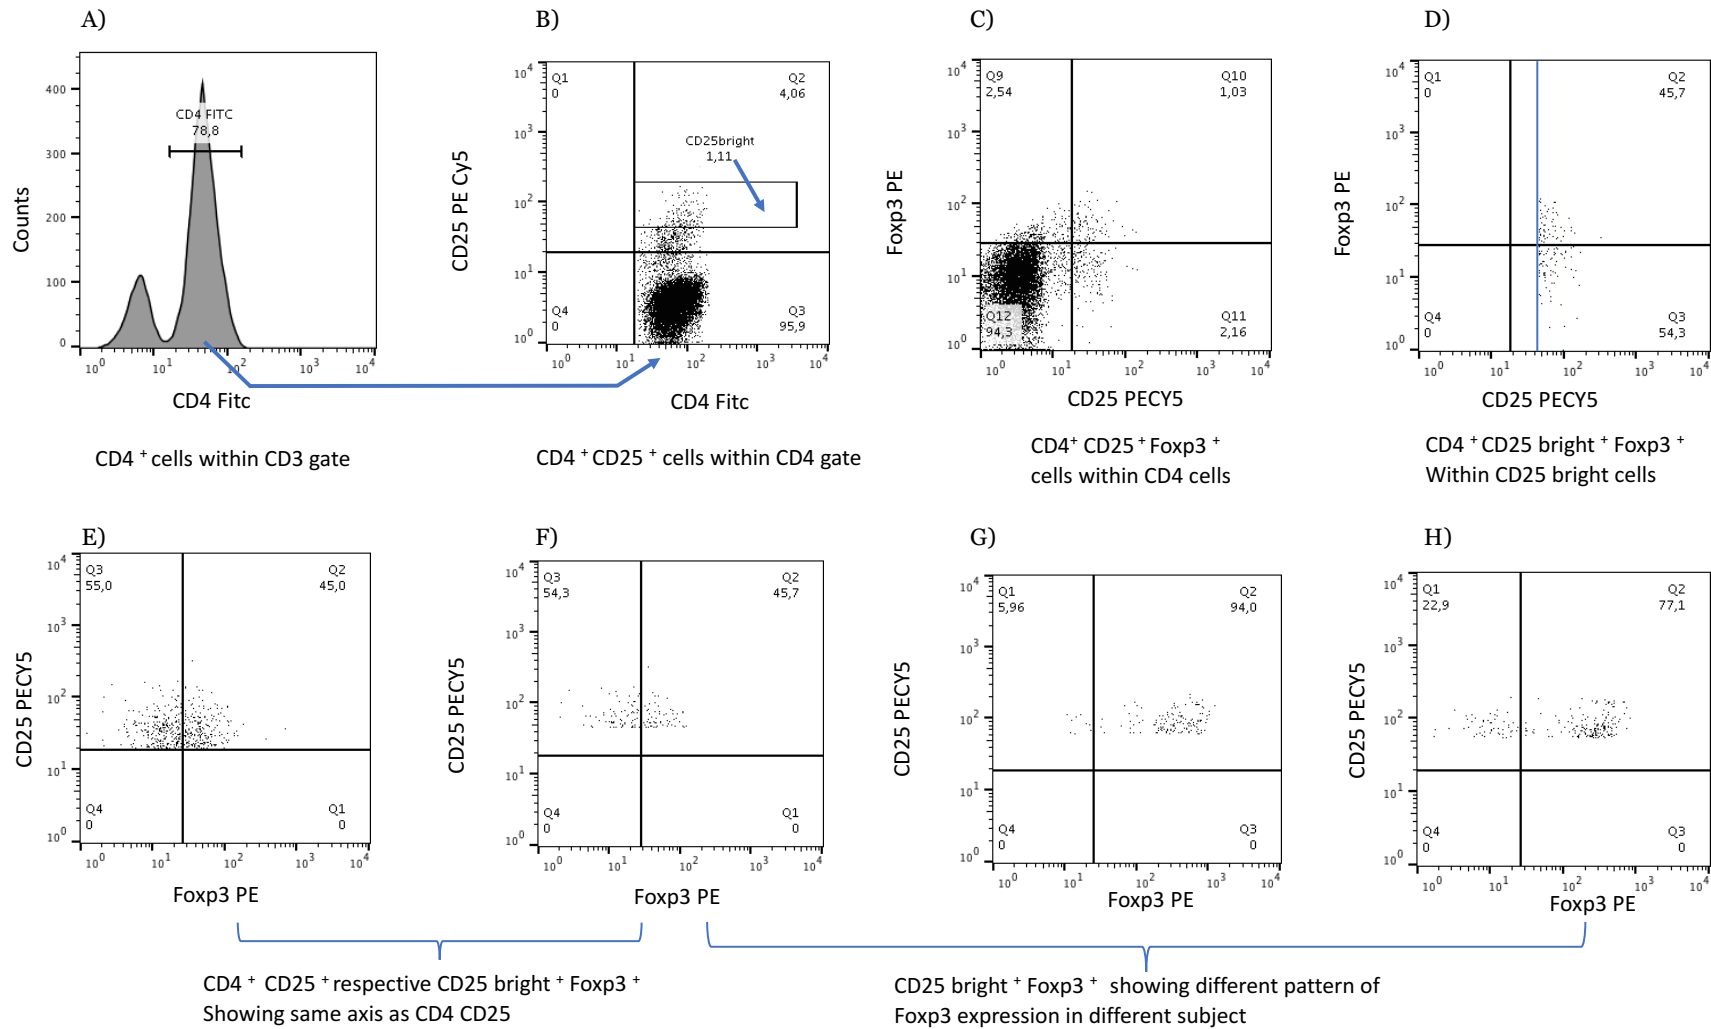

1.3 Example plots for the FoxP3<sup>+</sup> population. A) CD4<sup>+</sup> cells within the CD3 gate. B) CD4<sup>+</sup> CD25<sup>+</sup> cells within the CD4 gate. Box indicating the CD25<sup>bright</sup> population. Panels C and D) Comparison plots, CD25 vs FoxP3: CD4<sup>+</sup> CD25<sup>+</sup> FoxP3<sup>+</sup> within CD4 cells; and CD4<sup>+</sup> CD25<sup>bright</sup> FoxP3<sup>+</sup> within CD25<sup>bright</sup> cells respectively. Panels E and F) Comparison of CD4<sup>+</sup> CD25<sup>+</sup> and CD4<sup>+</sup> CD25<sup>bright</sup> FoxP3<sup>+</sup>, same axis as panel B. Panels F, G and H) Different pattern of FoxP3 expression in relation to CD25<sup>bright</sup> in different subjects.

**Table 2: Flow cytometry analysis of activated and regulatory T cells in BAL fluid, given in percent**

| <b>Part 1: Characterizing the inflammation</b> |                        |                                                   |                                                  |          |
|------------------------------------------------|------------------------|---------------------------------------------------|--------------------------------------------------|----------|
|                                                | <b>COPD<br/>n = 18</b> | <b>Ever-smokers<br/>with normal LF<br/>n = 13</b> | <b>Non-smokers<br/>with normal LF<br/>n = 15</b> | <b>p</b> |
| Activated T helper cells                       | 2.0 (1.4-3.6)          | 1.4 (1.2-3.0)                                     | 1.4 (1.0-2.4)                                    | NS       |
| FoxP3 <sup>+</sup> regulatory T cells          | 73 (60-82)             | 78 (55-86)                                        | 73 (61-79)                                       | NS       |

Data are given as median with IQR. Percentage calculated out of gated cells, see main article Table 2. Statistical comparisons between the three groups were made using Kruskal Wallis test and a p-value < 0.05 was considered significant. NS: Not significant.

| <b>Part 2: Separating the effect of smoking from that of COPD</b> |                                            |                                      |                                                 |          |
|-------------------------------------------------------------------|--------------------------------------------|--------------------------------------|-------------------------------------------------|----------|
|                                                                   | <b>COPD<br/>current smokers<br/>n = 10</b> | <b>COPD<br/>ex-smokers<br/>n = 8</b> | <b>Ex-smokers<br/>with normal LF<br/>n = 11</b> | <b>p</b> |
| Activated T helper cells                                          | 2.1 (1.6-4.6)                              | 1.4 (1.05-3.0)                       | 1.3 (1.1-1.5)                                   | NS       |
| FoxP3 <sup>+</sup> regulatory T cells                             | 75 (63-81)                                 | 70 (48-90)                           | 78 (63-87)                                      | NS       |

Data are given as median with IQR. Percentage calculated out of gated cells, see main article Table 2. Statistical comparisons between the three groups were made using Kruskal Wallis test and a p-value < 0.05 was considered significant. NS: Not significant.

| <b>Part 3: COPD and a rapid/non-rapid decline in lung function</b> |                                                               |                                                                  |                  |
|--------------------------------------------------------------------|---------------------------------------------------------------|------------------------------------------------------------------|------------------|
|                                                                    | <b>COPD<br/>rapid decline<br/>in lung function<br/>n = 11</b> | <b>COPD<br/>non-rapid decline<br/>in lung function<br/>n = 7</b> | <b>p</b>         |
| Activated T helper cells                                           | 1.9 (1.2-2.2)                                                 | 2.9 (1.4-4.8)                                                    | NS               |
| FoxP3 <sup>+</sup> regulatory T cells                              | 64 (58-80)                                                    | 86 (67-91)                                                       | <b>p = 0.019</b> |

Data are given as median with IQR. Statistical comparisons between the two groups were made using the Mann-Whitney U-test and a p-value < 0.05 was considered significant. NS: Not significant.

**Table 3: Flow cytometry analysis of activated and regulatory T cells in BAL fluid, given in cells/ml x 10<sup>2</sup>**

| <b>Part 1: Characterizing the inflammation</b> |                        |                                                   |                                                  |          |
|------------------------------------------------|------------------------|---------------------------------------------------|--------------------------------------------------|----------|
|                                                | <b>COPD<br/>n = 18</b> | <b>Ever-smokers<br/>with normal LF<br/>n = 13</b> | <b>Non-smokers<br/>with normal LF<br/>n = 15</b> | <b>p</b> |
| Activated T helper cells                       | 1.6 (0.81-2.7)         | 1.3 (1.0-2.9)                                     | 2.2 (1.5-3.5)                                    | NS       |
| FoxP3 <sup>+</sup> regulatory T cells          | 1.1 (0.49-2.2)         | 1.1 (0.66-2.2)                                    | 1.5 (0.84-2.2)                                   | NS       |

Data are given as median with IQR. Percentage calculated out of gated cells, see main article Table 2. Statistical comparisons between the three groups were made using Kruskal Wallis test and a p-value < 0.05 was considered significant. *NS*: Not significant.

| <b>Part 2: Separating the effect of smoking from that of COPD</b> |                                            |                                      |                                                 |          |
|-------------------------------------------------------------------|--------------------------------------------|--------------------------------------|-------------------------------------------------|----------|
|                                                                   | <b>COPD<br/>current smokers<br/>n = 10</b> | <b>COPD<br/>ex-smokers<br/>n = 8</b> | <b>Ex-smokers<br/>with normal LF<br/>n = 11</b> | <b>p</b> |
| Activated T helper cells                                          | 1.6 (0.79-3.8)                             | 1.6 (0.80-2.4)                       | 1.3 (0.95-2.7)                                  | NS       |
| FoxP3 <sup>+</sup> regulatory T cells                             | 1.1 (0.47-3.1)                             | 1.0 (0.50-1.9)                       | 0.90 (0.55-1.7)                                 | NS       |

Data are given as median with IQR. Percentage calculated out of gated cells, see main article Table 2. Statistical comparisons between the three groups were made using Kruskal Wallis test and a p-value < 0.05 was considered significant. *NS*: Not significant.

| <b>Part 3: COPD and a rapid/non-rapid decline in lung function</b> |                                                               |                                                                  |          |
|--------------------------------------------------------------------|---------------------------------------------------------------|------------------------------------------------------------------|----------|
|                                                                    | <b>COPD<br/>rapid decline<br/>in lung function<br/>n = 11</b> | <b>COPD<br/>non-rapid decline<br/>in lung function<br/>n = 7</b> | <b>p</b> |
| Activated T helper cells                                           | 1.6 (1.1-2.4)                                                 | 1.7 (0.58-4.2)                                                   | NS       |
| FoxP3 <sup>+</sup> regulatory T cells                              | 1.1 (0.66-1.4)                                                | 1.5 (0.39-3.6)                                                   | NS       |

Data are given as median with IQR. Statistical comparisons between the two groups were made using the Mann-Whitney U-test and a p-value < 0.05 was considered significant. *NS*: Not significant.

**Table 4 Differential cell counts of leukocytes of in BAL fluid, given in number of cells/ml x10<sup>4</sup>**

| <b>Part 1: Characterizing the inflammation</b> |                        |                                                   |                                                  |          |
|------------------------------------------------|------------------------|---------------------------------------------------|--------------------------------------------------|----------|
|                                                | <b>COPD<br/>n = 19</b> | <b>Ever-smokers<br/>with normal LF<br/>n = 15</b> | <b>Non-smokers<br/>with normal LF<br/>n = 15</b> | <b>p</b> |
| Macrophages                                    | 17 (11-27)             | 14 (9.3-31)                                       | 11 (8.6-16)                                      | NS       |
| Neutrophils                                    | 0.18 (0.088-0.81)      | 0.11 (0.049-0.23)                                 | 0.1 (0.044-0.17)                                 | NS       |
| Lymphocytes                                    | 1.8(0.78-2.6)          | 1.6(1.3-3.6)                                      | 2.1(1.4-3.8)                                     | NS       |
| Eosinophils                                    | 0.077 (0-0.37)         | 0.022 (0-0.2)                                     | 0.027 (0-0.044)                                  | NS       |
| Mast cells                                     | 0.029 (0-0.11)         | 0.0043 (0-0.049)                                  | 0.017 (0.0056-0.02)                              | NS       |

Data are given as median with IQR. Statistical comparisons between the three groups were made using Kruskal Wallis test and a p-value < 0.05 was considered significant. NS: Not significant.

| <b>Part 2: Separating the effect of smoking from that of COPD</b> |                                                       |                                                 |                                                           |                                  |
|-------------------------------------------------------------------|-------------------------------------------------------|-------------------------------------------------|-----------------------------------------------------------|----------------------------------|
|                                                                   | <b>COPD<br/>current smokers<br/>(CCuS)<br/>n = 10</b> | <b>COPD<br/>ex-smokers<br/>(CExS)<br/>n = 9</b> | <b>Ex-smokers<br/>with normal LF<br/>(ExS)<br/>n = 12</b> | <b>p</b>                         |
| Macrophages                                                       | 22 (19-34)                                            | 11 (8.4-15)                                     | 13 (8.7-17)                                               | <b>p = 0.003</b><br>CCuS vs CExS |
| Neutrophils                                                       | 0.17 (0.081-0.72)                                     | 0.18 (0.065-1.5)                                | 0.11 (0.053-0.22)                                         | NS                               |
| Lymphocytes                                                       | 1.8 (0.92-2.7)                                        | 1.8 (0.75-2.6)                                  | 1.9 (0.83-3.4)                                            | NS                               |
| Eosinophils                                                       | 0.11 (0-0.24)                                         | 0.068 (0.013-0.44)                              | 0.02 (0-0.032)                                            | NS                               |
| Mast cells                                                        | 0.093 (0.022-0.13)                                    | 0.0051 (0-0.029)                                | 0.0014 (0-0.059)                                          | NS                               |

Data are given as median with IQR. Statistical comparisons between the three groups were made using Kruskal Wallis test and a p-value < 0.05 was considered significant. If the Kruskal Wallis test indicated significance, the Mann-Whitney U-test was used for post hoc analysis for comparison of CExS vs CCuS and CExS vs ExS. A p-value < 0.05 was considered significant. NS: Not significant.

| <b>Part 3: COPD and a rapid/non-rapid decline in lung function</b> |                                                               |                                                                  |          |
|--------------------------------------------------------------------|---------------------------------------------------------------|------------------------------------------------------------------|----------|
|                                                                    | <b>COPD<br/>rapid decline<br/>in lung function<br/>n = 11</b> | <b>COPD<br/>non-rapid decline<br/>in lung function<br/>n = 8</b> | <b>p</b> |
| Macrophages                                                        | 21 (13-27)                                                    | 13 (8.3-26)                                                      | NS       |
| Neutrophils                                                        | 0.18 (0.094-0.81)                                             | 0.13 (0.038-0.88)                                                | NS       |
| Lymphocytes                                                        | 1.9 (1-3.2)                                                   | 1.6 (0.71-2.1)                                                   | NS       |
| Eosinophils                                                        | 0.068 (0-0.13)                                                | 0.12 (0.0063-0.52)                                               | NS       |
| Mast cells                                                         | 0.065 (0.022-0.11)                                            | 0.0049 (0-0.095)                                                 | NS       |

Data are given as median with IQR. Statistical comparisons between the two groups were made using the Mann-Whitney U-test and a p-value < 0.05 was considered significant. NS: Not significant.
